# Supplementary material for: Taxifolin and Sorghum Ethanol Extract Protect against Hepatic Insulin Resistance via the miR-195/IRS1/PI3K/AKT and AMPK Signalling Pathways
Source: MDPI journal article supplement (doi:10.3390/antiox10091331), 2021-08-24
Supplement: s1 [file s1]

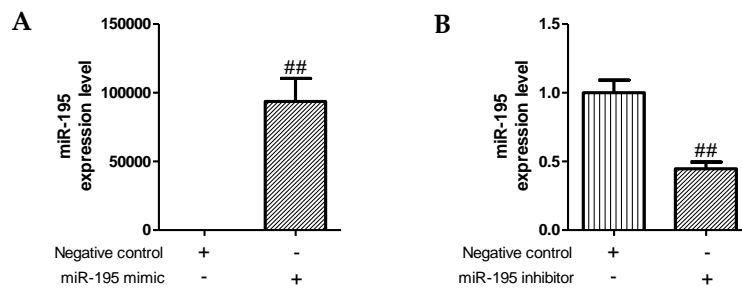

**Figure S1.** Overexpression and silencing of microRNA-195: miR-195 expression was significantly increased by transfection with (A) the miR-195 mimic and decreased by transfection with (B) the miR-195 inhibitor. <sup>##</sup> $P < 0.01$  versus the negative control cells.
